# Supplementary material for: Progenitor with cardiometabolic disorders increases food intake, systemic inflammation and gut microbiota alterations in the second-generation offspring
Source: Royal Society of Chemistry journal article supplement (doi:10.1039/d1fo02838c), 2022-01-01
Supplement: d1fo02838c1.pdf [file d1fo02838c1.pdf]

## Supplement

**Table 1:** Rat Genome Database (RGD) accession numbers and primer sequences of genes selected for qRT-PCR

| Gene                           | Accession number (RGDID) | Primer sequence (5'-3')                                             |
|--------------------------------|--------------------------|---------------------------------------------------------------------|
| <i>TNF-<math>\alpha</math></i> | NM_012675.3              | F 5'- CGTCAGCCGATTTGCCATTT -3'<br>R5'- TCCCTCAGGGGTGTCCTTAG -3'     |
| <i>Adiponectin</i>             | NM_144744.3              | F 5'- GCCGTTCTCTTCACCTACGACC -3'<br>R 5'- GGTCTCCACCTCCAGATGG -3'   |
| <i>Caveolin</i>                | NM_031556.3              | F 5'- CGCACACCAAGGAGATTGA -3'<br>R 5'- CCATAGGGATGCCGAAGATG -3'     |
| <i>MCP-1</i>                   | NM_031530.1              | F 5'- TAGCATCCACGTGCTGTCTC -3'<br>R 5'- CAGCCGACTCATTGGGATCA -3'    |
| <i>TJP-1</i>                   | NM_001106266.1           | F 5'- GCAATTCCGTATCGTTGGATTT -3'<br>R 5'- CGGTTGTATGCTGGAGTGAT -3'  |
| <i>IL-6</i>                    | NM_012589.2              | F 5'- CATTTCACAAGTCGGAGGCT -3'<br>R 5'- TCTGACAGTGCATCATCGCT -3'    |
| <i>MyD-88</i>                  | NM_198130.1              | F 5'- GACAGCAGTGTCCCACAGAC -3'<br>R 5'- AGCAGATGAAGGCGTCGAAA -3'    |
| <i>TLR-2</i>                   | NM_198769.2              | F 5'- ATCACTGCACCCTCAATGATGGG -3'<br>R 5'- TGTGCAGGCTCCGTATTGTT -3' |
| <i>TLR-4</i>                   | NM_019178.1              | F 5'- TTTCTGAGTAGCCGCTCTGG -3'<br>R 5'- CTCCCCTCGACGTAGGTGT -3'     |
| <i>Hprt1</i>                   | NM_012583.2              | F 5'- TAGGTCCATTCCATGACTGTAGA -3'<br>R 5'- TGGCCTGTATCCAACACTTC -3' |

Primers used (*Forward e Reverse*)

**Table 2:** Relative abundance (%) of bacterial families of F<sub>2</sub>-G<sub>0</sub>H offspring from progenitors (G<sub>0</sub>H) who consumed a high-fat diet

|                                             | G <sub>0</sub> C | G <sub>0</sub> H | F <sub>2</sub> -G <sub>0</sub> C | F <sub>2</sub> -G <sub>0</sub> H |
|---------------------------------------------|------------------|------------------|----------------------------------|----------------------------------|
| <b>Bacterial do Filo Actinobacteria (-)</b> |                  |                  |                                  |                                  |
| <i>Desulfovibrionaceae</i> (-)              | 0,00             | 0,00             | 0,03                             | 0,00                             |
| <i>Prochlorococcaceae</i> (-)               | 0,00             | 0,00             | 0,01                             | 0,00                             |
| <b>Subtotal</b>                             | <b>0,00%</b>     | <b>0,00%</b>     | <b>0,04%</b>                     | <b>0,00%</b>                     |
| <b>Bacterial do Filo Bacteroidetes (-)</b>  |                  |                  |                                  |                                  |
| <i>Bacteroidaceae</i> (-)                   | 0,92             | 13,28            | 0,65                             | 7,96                             |
| <i>Porphyromonadaceae</i> (-)               | 4,83             | 6,32             | 2,69                             | 0,23                             |
| <i>Prevotellaceae</i> (-)                   | 69,58            | 20,92            | 81,63                            | 78,16                            |
| <i>Prolixibacteraceae</i> (-)               | 0,22             | 0,34             | 0,37                             | 1,14                             |
| <i>Rikenellaceae</i> (-)                    | <b>0,00</b>      | <b>0,00</b>      | <b>0,00</b>                      | <b>0,36</b>                      |
| <b>Subtotal</b>                             | <b>75,56%</b>    | <b>40,85%</b>    | <b>85,40%</b>                    | <b>87,86%</b>                    |
| <b>Bacterial do Filo Cyanobacteria (-)</b>  |                  |                  |                                  |                                  |
| <i>Aerococcaceae</i> (+)                    | 0,00             | 0,00             | 0,00                             | 0,02                             |
| <b>Subtotal</b>                             | <b>0,00%</b>     | <b>0,00%</b>     | <b>0,00%</b>                     | <b>0,02%</b>                     |
| <b>Bacterial do Filo Fibrobacteres (-)</b>  |                  |                  |                                  |                                  |
| <i>Fibrobacteraceae</i> (-)                 | 0,00             | 0,00             | 0,02                             | 0,01                             |
| <b>Subtotal</b>                             | <b>0,00%</b>     | <b>0,00%</b>     | <b>0,02%</b>                     | <b>0,01%</b>                     |
| <b>Bacterial do Filo Firmicutes (+)</b>     |                  |                  |                                  |                                  |
| <i>Bacillaceae</i> (+)                      | <b>0,00</b>      | <b>0,00</b>      | <b>0,00</b>                      | <b>0,26</b>                      |
| <i>Clostridiaceae</i> (+)                   | 1,38             | 3,02             | 1,11                             | 0,69                             |
| <i>Erysipelotrichaceae</i> (+)              | 0,39             | 0,68             | 0,28                             | 0,20                             |
| <i>Eubacteraceae</i> (+)                    | 6,77             | 22,48            | 2,90                             | 0,83                             |
| <i>Lachospiraceae</i> (+)                   | 0,86             | 3,33             | 1,57                             | 2,51                             |
| <i>Lactobacillaceae</i> (+)                 | 3,81             | 16,37            | 1,40                             | 0,42                             |
| <i>Ruminococcaceae</i> (+)                  | 0,55             | 2,50             | 0,91                             | 1,69                             |
| <b>Subtotal</b>                             | <b>13,76%</b>    | <b>48,38%</b>    | <b>8,30%</b>                     | <b>6,61%</b>                     |
| <b>Bacterial do Filo Firmicutes (-)</b>     |                  |                  |                                  |                                  |
| <i>Veillonellaceae</i>                      | <b>0,00</b>      | <b>0,00</b>      | <b>0,00</b>                      | <b>0,33</b>                      |
| <b>Subtotal</b>                             | <b>0,00%</b>     | <b>0,00%</b>     | <b>0,00%</b>                     | <b>0,33%</b>                     |
| <b>Bacterial do Filo Proteobacteria (-)</b> |                  |                  |                                  |                                  |
| <i>Enterococcaceae</i>                      | 0,00             | 0,00             | 0,02                             | 0,00                             |
| <b>Subtotal</b>                             | <b>0,00%</b>     | <b>0,00%</b>     | <b>0,02%</b>                     | <b>0,00%</b>                     |
| <b>Bacterial do Filo Spirochaetes (-)</b>   |                  |                  |                                  |                                  |
| <i>Spirochaetaceae</i> (-)                  | 1,99             | 1,04             | 5,95                             | 2,16                             |
| <b>Subtotal</b>                             | <b>1,99%</b>     | <b>1,04%</b>     | <b>5,95%</b>                     | <b>2,16%</b>                     |
| <b>Bacterial do Filo Tenericutes (-)</b>    |                  |                  |                                  |                                  |
| <i>Acholeplasmataceae</i> (-)               | 6,79             | 9,70             | 0,21                             | 2,58                             |
| <i>Mycoplasmataceae</i> (-)                 | <b>0,00</b>      | <b>0,00</b>      | <b>0,00</b>                      | <b>0,06</b>                      |
| <i>Spiroplasmataceae</i> (-)                | 1,90             | 0,03             | 0,06                             | 0,36                             |
| <b>Subtotal</b>                             | <b>8,69%</b>     | <b>9,73%</b>     | <b>0,27%</b>                     | <b>3,01%</b>                     |
| <b>Total</b>                                | <b>100%</b>      | <b>100%</b>      | <b>100%</b>                      | <b>100%</b>                      |
